# Supplementary material for: Elevated Serotonin and NT-proBNP Levels Predict and Detect Carcinoid Heart Disease in a Large Validation Study
Source: MDPI journal article supplement (doi:10.3390/cancers14102361), 2022-05-10
Supplement: s1 [file s1]

# Elevated Serotonin and NT-proBNP Levels Predict and Detect Carcinoid Heart Disease in a Large Validation Study

Sonja Levy <sup>1,\*†</sup>, Aoife B. Kilgallen <sup>2,3,†</sup>, Catharina M. Korse <sup>4</sup>, Marish I. F. J. Oerlemans <sup>3</sup>, Joost P. G. Sluijter <sup>2,3,5</sup>, Linda W. van Laake <sup>2,3</sup>, Gerlof D. Valk <sup>6,†</sup> and Margot E. T. Tesselaar <sup>1,†</sup>

<sup>1</sup> Department of Medical Oncology, Netherlands Cancer Institute, 1066 CX Amsterdam, The Netherlands; m.tesselaar@nki.nl

<sup>2</sup> Regenerative Medicine Centre Utrecht, Circulatory Health Laboratory, University Medical Centre Utrecht, 3584 CX Utrecht, The Netherlands; a.kilgallen@umcutrecht.nl (A.B.K.); j.sluijter@umcutrecht.nl (J.P.G.S.); l.w.vanlaake@umcutrecht.nl (L.W.v.L.)

<sup>3</sup> Division of Heart and Lungs, Department of Cardiology, Experimental Cardiology Laboratory, University Medical Centre Utrecht, 3584 CX Utrecht, The Netherlands; m.i.f.oerlemans-4@umcutrecht.nl

<sup>4</sup> Department of Laboratory Medicine, Netherlands Cancer Institute, 1066 CX Amsterdam, The Netherlands; t.korse@nki.nl

<sup>5</sup> Utrecht University, 3584 CS Utrecht, The Netherlands

<sup>6</sup> Department of Endocrine Oncology, University Medical Centre Utrecht, 3584 CX Utrecht, The Netherlands; g.d.valk@umcutrecht.nl

\* Correspondence: so.levy@nki.nl; Tel.: +31-20-512-9111

† These authors contributed equally to this work.

**Table S1.** Individual CHD-scores per patient.

| Patient | TV – regurgitation | TV – stenosis | TV – leaflet thickening | TV – leaflet excursion | TV – leaflet retraction | PV – regurgitation | PV – stenosis | PV – cusp thick | PV – cusp excursion | PV – cusp retraction | RA – dilation | RV – dilation | RV – impairment | MV – regurgitation | MV – stenosis | MV – leaflet thickening | MV – leaflet excursion | MV – leaflet retraction | AV – regurgitation | AV – stenosis | AV – cusp thickening | AV – excursion | AV – retraction | CHD – score |
|---------|--------------------|---------------|-------------------------|------------------------|-------------------------|--------------------|---------------|-----------------|---------------------|----------------------|---------------|---------------|-----------------|--------------------|---------------|-------------------------|------------------------|-------------------------|--------------------|---------------|----------------------|----------------|-----------------|-------------|
| 1       | 3                  |               | 3                       | 3                      | 3                       | 0                  | 0             |                 |                     |                      |               | 3             | 3               | 0                  | 0             | 0                       | 0                      | 0                       | 0                  | 0             | 0                    | 0              | 0               | 18          |
| 2       | 3                  |               | 3                       |                        | 3                       | 2                  | 2             | 2               |                     |                      |               | 3             |                 | 0                  | 0             | 0                       | 0                      | 0                       | 0                  | 0             | 0                    | 0              | 0               | 18          |
| 3       | 3                  | 3             |                         |                        | 3                       |                    |               |                 |                     |                      |               |               |                 | 1                  |               |                         |                        |                         | 1                  |               |                      |                |                 | 11          |
| 4       | 3                  | 0             | 3                       |                        |                         | 2                  | 1             |                 |                     |                      |               | 3             | 0               | 1                  |               |                         |                        |                         |                    | 1             |                      |                |                 | 14          |
| 5       | 3                  | 0             |                         |                        |                         | 3                  |               | 2               |                     |                      |               | 2             | 1               | 1                  |               | 1                       |                        |                         | 1                  |               |                      |                |                 | 14          |
| 6       | 3                  |               | 3                       |                        |                         | 3                  | 1             |                 |                     |                      |               | 2             | 0               | 1                  |               | 1                       |                        |                         | 0                  |               |                      |                |                 | 14          |
| 7       | 2                  | 0             | 2                       |                        |                         | 1                  | 0             | 0               |                     |                      |               |               |                 | 3                  |               |                         |                        |                         | 1                  |               |                      |                |                 | 9           |
| 8       | 2                  |               | 2                       |                        |                         |                    |               |                 |                     |                      |               |               |                 |                    |               |                         |                        |                         |                    |               |                      |                |                 | 4           |
| 9       | 3                  |               | 2                       |                        |                         | 1                  |               |                 |                     |                      |               | 0             | 0               | 3                  |               |                         |                        |                         |                    |               | 1                    |                |                 | 10          |
| 10      | 3                  |               | 3                       |                        |                         | 3                  | 3             |                 |                     |                      |               | 2             | 0               | 1                  |               |                         |                        |                         | 1                  |               |                      |                |                 | 16          |
| 11      | 2                  |               | 2                       |                        |                         | 0                  | 0             |                 |                     |                      |               | 0             | 0               | 1                  |               |                         |                        |                         | 1                  |               | 1                    |                |                 | 7           |
| 12      | 3                  | 2             | 3                       |                        | 3                       | 1                  | 0             |                 |                     |                      |               | 1             | 0               | 1                  |               |                         |                        |                         | 1                  |               |                      |                |                 | 15          |
| 13      | 3                  | 0             | 1                       |                        |                         | 1                  | 0             |                 |                     |                      |               | 0             | 0               | 2                  |               | 1                       |                        |                         |                    |               |                      |                |                 | 8           |
| 14      | 3                  |               | 1                       |                        |                         |                    |               |                 |                     |                      |               | 0             | 0               | 1                  |               |                         |                        |                         | 1                  |               |                      |                |                 | 6           |
| 15      | 3                  |               | 1                       |                        |                         |                    |               |                 |                     |                      |               |               |                 |                    |               |                         |                        |                         |                    |               |                      |                |                 | 4           |
| 16      | 3                  |               |                         |                        |                         |                    |               |                 |                     |                      |               | 3             |                 |                    |               |                         |                        |                         |                    |               |                      |                |                 | 6           |

|    |   |   |   |   |   |   |   |   |   |   |   |   |   |    |
|----|---|---|---|---|---|---|---|---|---|---|---|---|---|----|
| 17 | 2 | 3 |   | 2 |   | 3 |   | 0 |   | 0 | 1 |   |   | 11 |
| 18 | 3 |   |   |   |   |   |   | 0 |   | 0 | 0 |   | 1 | 4  |
| 19 | 3 | 2 |   |   |   |   |   | 2 |   | 0 | 1 | 2 |   | 10 |
| 20 | 2 | 0 | 2 | 0 |   | 0 |   |   |   |   | 1 |   |   | 5  |
| 21 | 2 | 2 |   |   |   |   |   | 1 |   | 0 | 2 | 2 |   | 11 |
| 22 | 3 | 3 |   | 3 |   |   |   | 2 |   | 0 | 1 |   |   | 12 |
| 23 | 3 |   |   | 3 |   |   |   | 2 |   | 0 | 2 | 0 |   | 10 |
| 24 | 3 |   |   |   |   |   |   |   |   |   |   |   |   | 3  |
| 25 | 3 | 2 |   |   | 1 | 0 | 3 |   | 1 |   |   |   |   | 10 |
| 26 | 3 | 2 | 2 | 3 |   | 2 | 3 |   | 2 | 2 | 0 |   |   | 19 |
| 27 | 3 |   |   |   |   |   |   |   |   |   |   |   |   | 3  |
| 28 | 3 | 3 |   | 0 |   | 0 | 2 |   | 0 | 1 |   |   |   | 9  |
| 29 | 2 | 1 |   |   |   |   |   | 0 |   | 1 |   |   |   | 4  |
| 30 | 2 |   |   | 2 | 3 |   |   | 1 |   | 0 | 1 | 1 |   | 10 |
| 31 | 3 | 3 |   | 3 |   |   |   | 0 |   | 2 | 2 |   |   | 13 |
| 32 | 3 |   |   | 3 | 3 | 3 |   | 0 |   | 0 |   |   |   | 12 |
| 33 | 2 |   |   | 3 | 1 |   |   | 0 |   | 0 | 2 | 0 |   | 8  |
| 34 | 3 |   |   | 3 |   |   |   | 1 |   | 0 | 1 | 1 |   | 9  |
| 35 | 3 | 3 |   | 2 |   | 0 | 2 |   |   |   |   |   |   | 10 |
| 36 | 3 | 2 |   | 3 |   |   |   | 3 |   | 2 | 1 |   |   | 14 |
| 37 | 3 |   |   |   |   |   |   |   |   |   |   |   |   | 3  |
| 38 | 3 |   |   | 3 | 3 | 3 |   | 0 |   | 2 |   |   |   | 14 |
| 39 | 3 | 2 |   | 1 | 1 | 2 |   | 0 |   | 1 |   |   |   | 10 |
| 40 | 4 |   |   | 2 |   | 1 |   |   |   |   |   |   |   | 5  |
| 41 | 3 | 3 |   | 1 |   | 2 |   | 2 |   | 0 | 1 |   |   | 12 |
| 42 | 2 | 3 |   | 3 |   | 3 |   | 2 |   | 0 | 1 |   |   | 14 |
| 43 | 3 | 3 |   | 0 |   |   |   | 2 |   | 0 | 0 | 0 |   | 8  |
| 44 | 3 | 3 |   | 3 |   | 2 | 2 |   | 0 | 1 | 1 |   |   | 15 |
| 45 | 3 |   |   |   |   |   |   |   |   |   |   |   |   | 3  |
| 46 | 3 |   |   | 2 |   |   |   |   |   |   |   |   |   | 5  |
| 47 | 1 |   |   | 3 |   | 1 |   | 0 |   | 0 | 0 |   |   | 5  |
| 48 | 2 |   |   |   |   |   |   | 1 |   | 1 |   | 0 |   | 4  |
| 49 | 3 | 3 |   | 3 |   | 2 | 2 |   | 0 | 1 |   | 0 |   | 14 |
| 50 | 3 | 3 |   | 3 |   | 2 | 3 |   | 0 | 0 | 1 |   | 0 | 15 |
| 51 | 3 | 3 |   | 3 |   | 2 | 0 |   | 0 | 3 | 3 |   | 3 | 21 |
| 52 | 3 | 3 |   | 3 |   |   |   | 3 |   | 1 |   |   |   | 13 |
| 53 | 3 | 3 |   | 2 |   |   |   | 0 |   | 0 |   |   |   | 8  |
| 54 | 3 | 3 |   | 1 |   |   |   | 1 |   | 1 |   |   |   | 9  |
| 55 | 3 | 3 |   | 3 |   | 3 | 0 | 2 |   | 0 | 1 | 2 |   | 17 |
| 56 | 3 |   |   |   |   |   |   | 2 |   | 1 |   |   |   | 6  |
| 57 | 3 | 1 |   | 3 |   | 1 |   | 2 |   | 1 | 1 | 0 |   | 12 |

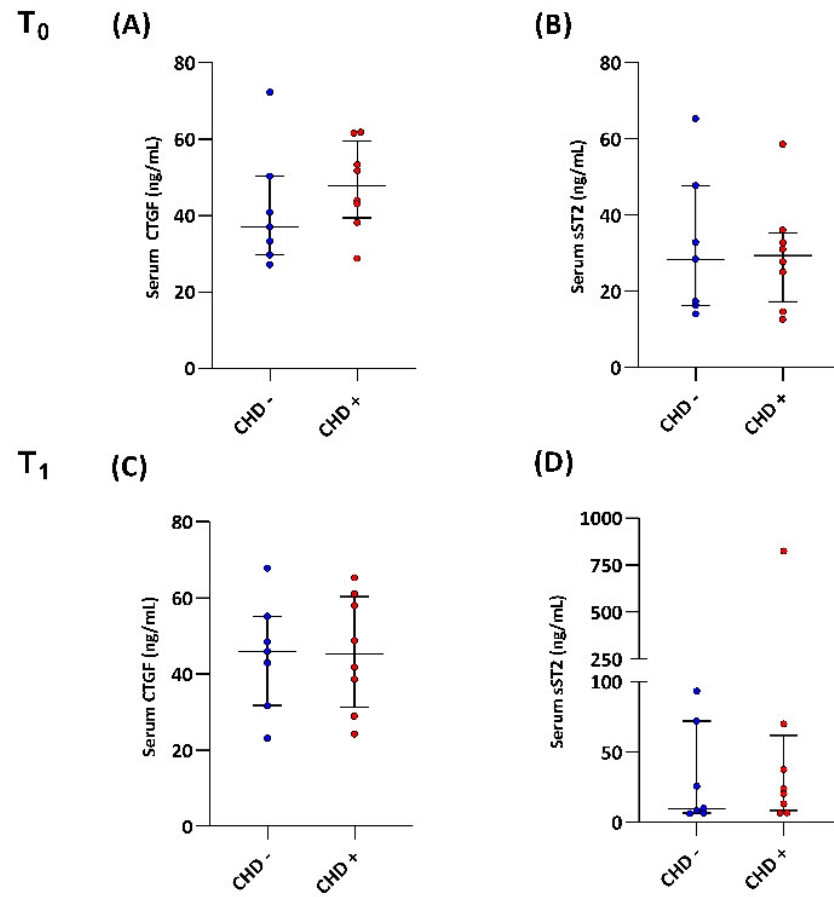

**Figure S1.** Serum sST2 and CTGF levels at time-points T0 and T1. Both sST2 ( $p = 0.867$ ) (A) and CCN2/ CTGF ( $p = 0.232$ ) (B) are not significantly different at T0. This is similar at T1 for serum sST2 ( $p = 0.694$ ) (C) and CCN2/ CTGF ( $p = 0.955$ ) (D).
